# Supplementary material
Source: publisher figshare collection journal article supplement (https://tandf.figshare.com/ndownloader/files/24689493)
Supplement: Supplementary file 1 [file 24689493]

## Supplementary information:

### A surfactant-stripped cabazitaxel micelle formulation optimized with accelerated storage stability

Boyang Sun, Jing Huang, Moustafa T. Mabrouk, Yumiao Zhang, Honglin Jin, Jonathan F. Lovell

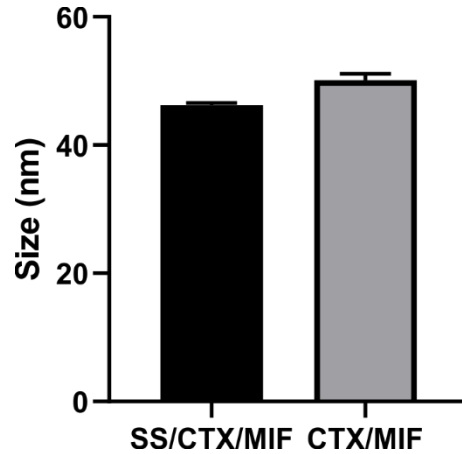

**Figure S1.** Micelle size, determined by hydrodynamic light scattering, before and after surfactant-stripping. Values show mean  $\pm$  std. dev. for  $n=3$  preparations. The sample PDI was a mean of 0.11 for both samples.

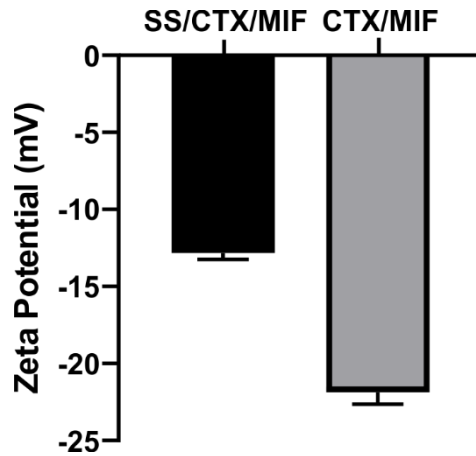

**Figure S2.** Micelle zeta potential before and after surfactant-stripping. Values show mean  $\pm$  std. dev. for  $n=3$  preparations.
